# Supplementary material
Source: publisher figshare collection journal article supplement (https://acs.figshare.com/ndownloader/files/4539355)

**“Structure and stability of ( $\alpha$ -CD)<sub>3</sub> agregate and OEG@( $\alpha$ -CD)<sub>3</sub> pseudo-rotaxane in aqueous solution: A molecular dynamics study”**

Cleber P. A. Anconi, Clebio S. Nascimento Jr., Wagner B. De Almeida, H lio F. Dos Santos

**Contents:**

**S1.** (Gas phase total energy and their contributions)

**S2.** (Root mean square deviation plots for simulations performed with AMBER\*, MM3\*, GAFF, GLYCAM\_06 and parm99 force fields, for the 3P starting arrangement.)

**S1.** Gas phase total energy and their contributions evaluated for the C empty sequence snapshots collected along MD simulations. The plots show that vdW and ELE terms are more sensitive to the formation of a 3P based arrangement that take place at approximately 4ns of simulation.

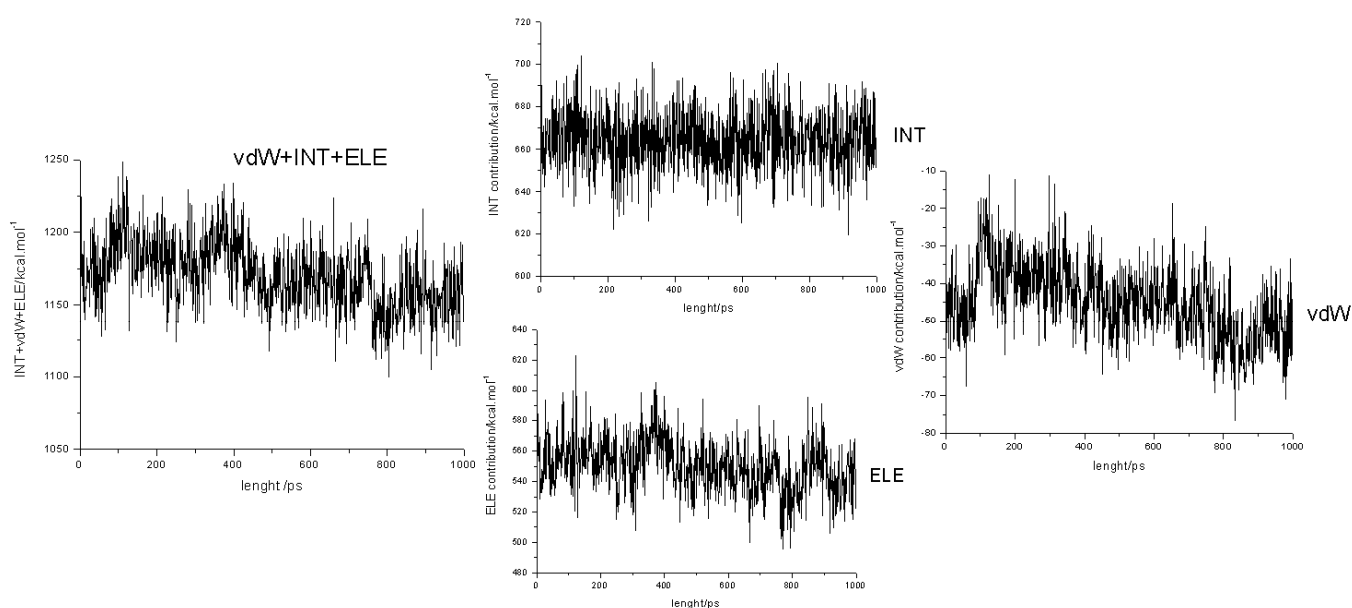

**S2.** Root mean square deviation (RMSD) plots for vacuum simulations performed with AMBER\*, MM3\*, GAFF, GLYCAM\_06 and parm99 force fields, for the 3P starting association at 300K.

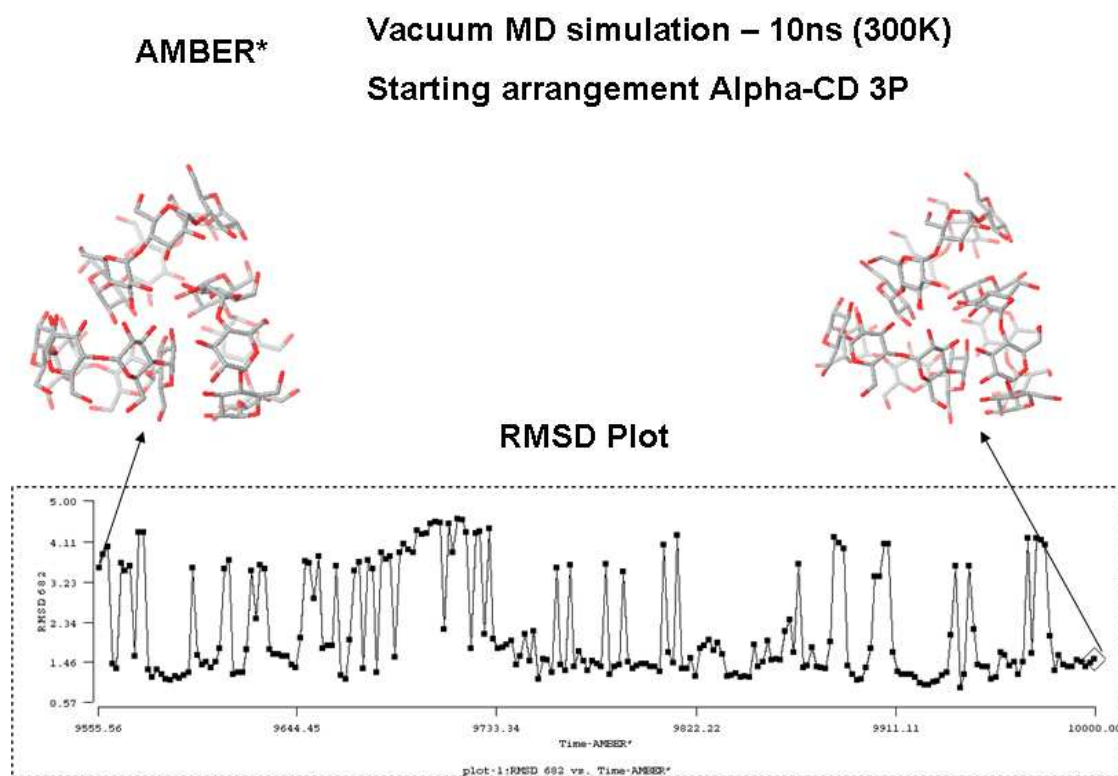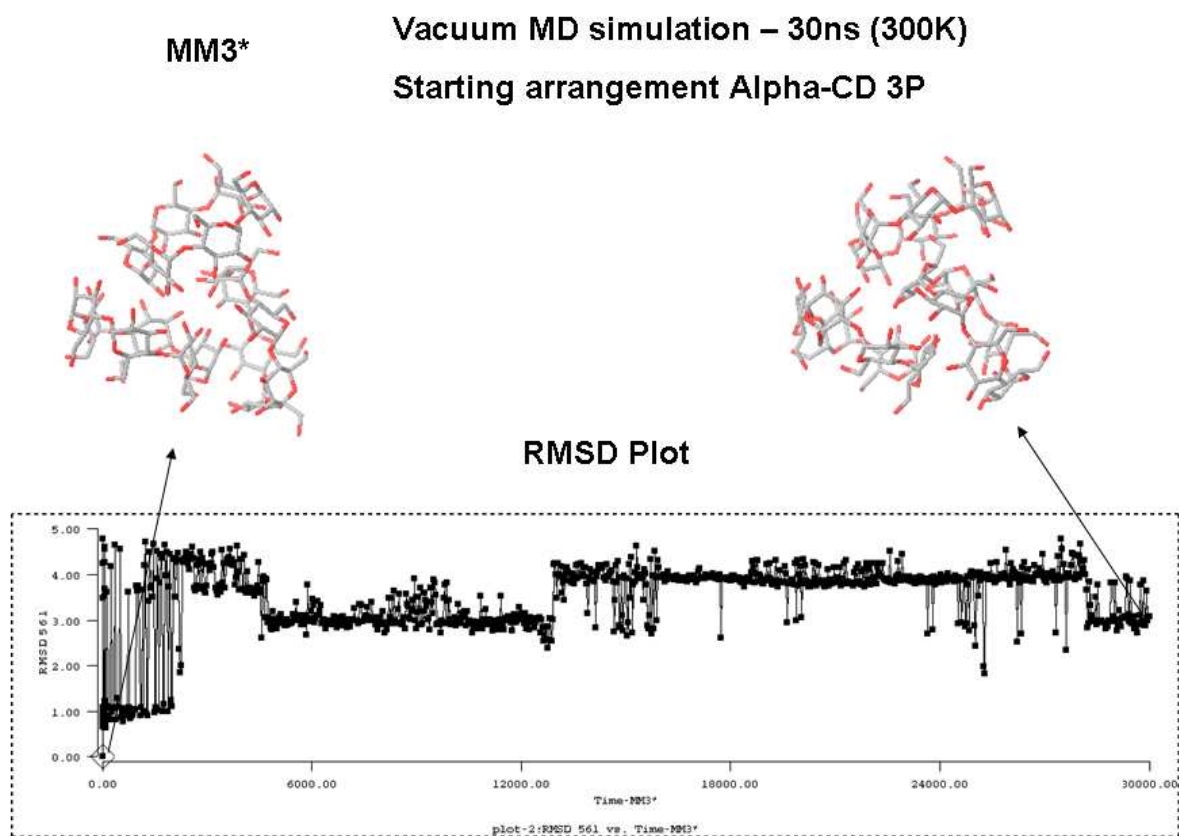

**GAFF**

**Vacuum MD simulation – 10ns (300K)**

**Starting arrangement Alpha-CD 3P**

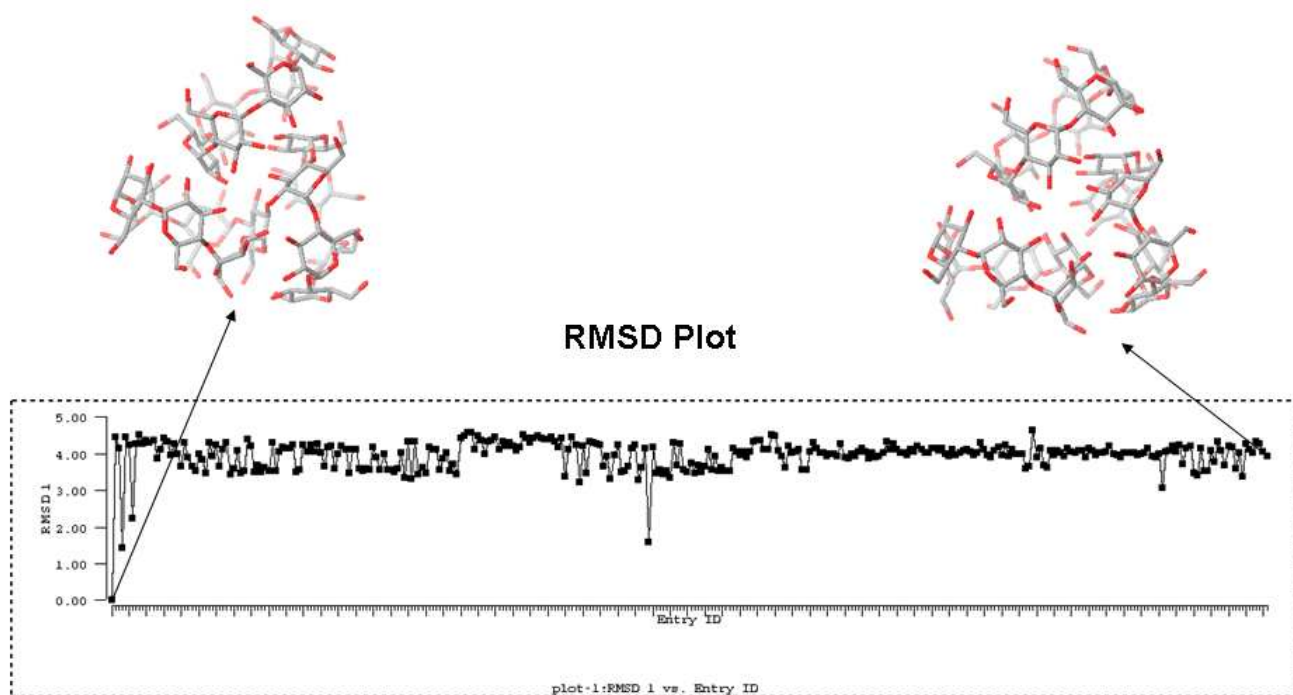

**GLYCAM\_06**

**Vacuum MD simulation – 10ns (300K)**

**Starting arrangement Alpha-CD 3P**

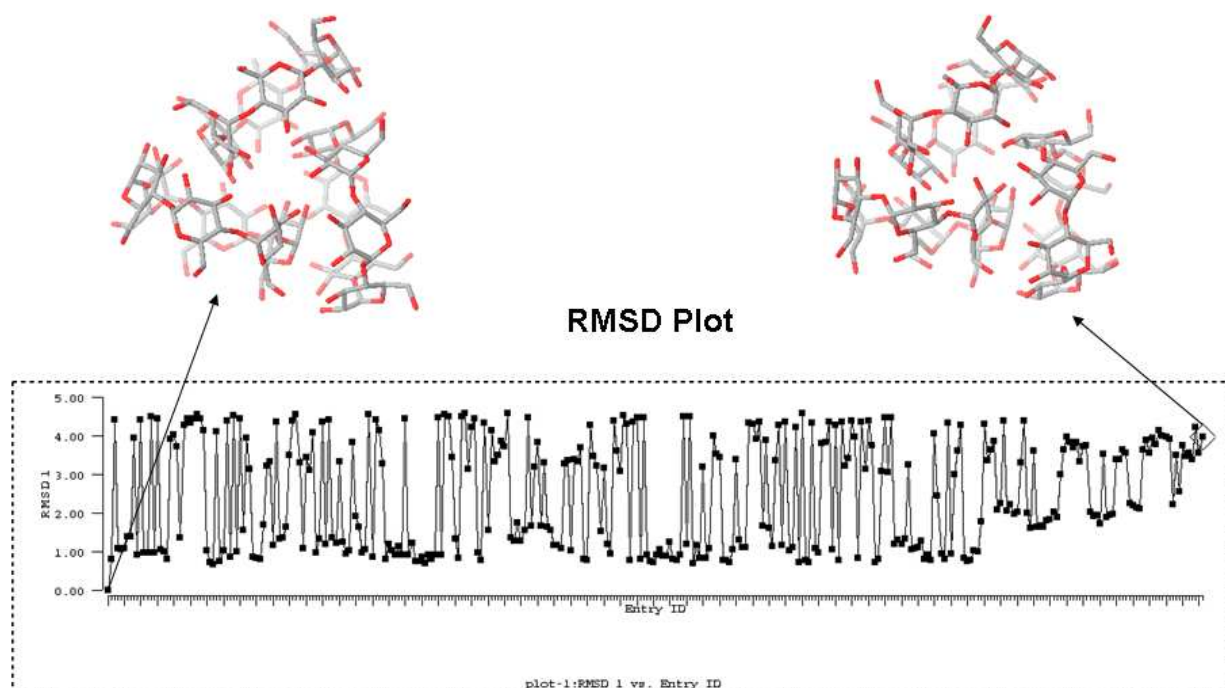

parm99

Vacuum MD simulation – 10ns (300K)

Starting arrangement Alpha-CD 3P

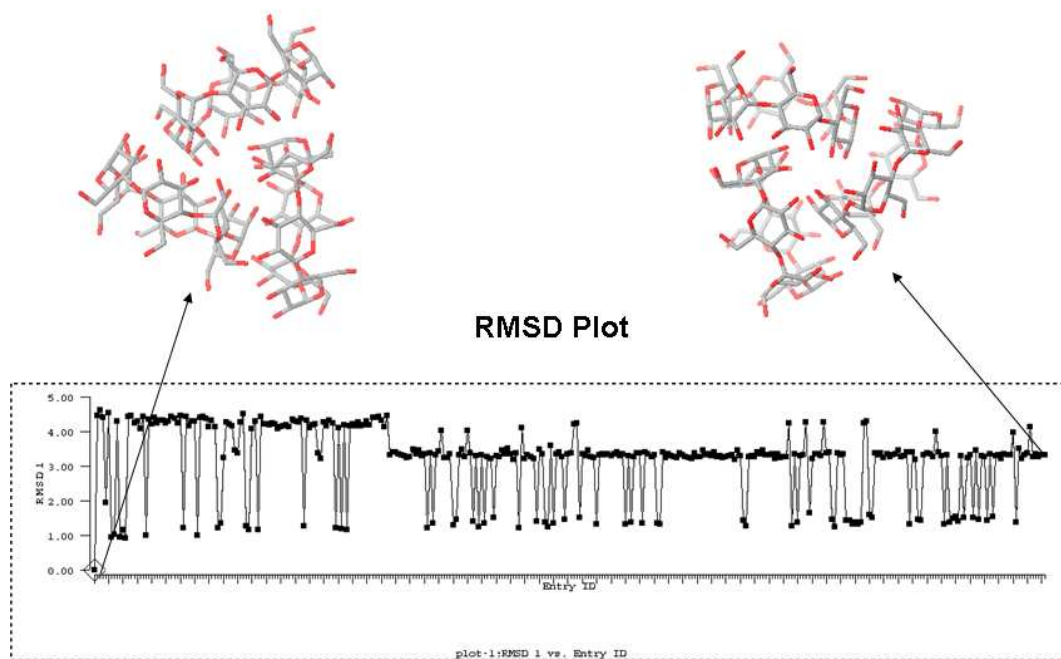

Supplement: Supplementary file 1 [file 4539355]
